# Supplementary material for: High-performance ultra-narrow-band green-emitting phosphor LaMgAl11O19:Mn2+ for wide color-gamut WLED backlight displays
Source: Royal Society of Chemistry journal article supplement (doi:10.1039/d2tc00850e), 2022-01-01
Supplement: d2tc00850e1.pdf [file d2tc00850e1.pdf]

## Supporting Information

### High-Performance Ultra-Narrow-Band Green-Emitting Phosphor $\text{LaMgAl}_{11}\text{O}_{19}:\text{Mn}^{2+}$ for Wide Color-Gamut WLEDs Backlight Display

Zhangyue Wu,<sup>a</sup> Chao Li,<sup>\*a</sup> Feng Zhang,<sup>\*a</sup> Shixiang Huang,<sup>a</sup> Feijiu Wang,<sup>a</sup> Xiaoming Wang,<sup>b</sup> Huan Jiao<sup>\*b</sup>

<sup>a</sup> Key Lab of Photovoltaic Materials of Henan Province, Henan University, Kaifeng 475001, P. R. China

E-mail: lichao\_henan@163.com, lichao@snnu.edu.cn, zhangfeng.home@163.com

<sup>b</sup> Key Laboratory of Macromolecular Science of Shaanxi Province, Shaanxi Engineering Laboratory for Advanced Energy Technology, Shaanxi Key Laboratory for Advanced Energy Devices, School of Chemistry & Chemical Engineering, Shaanxi Normal University, Xi'an 710062, P. R. China

Email: jiaohuan@snnu.edu.cn

## Electronic Supplementary Information (ESI):

### Experimental section

#### Synthesis

A series of LMAO: $\text{Mn}^{2+}$  phosphors samples were successfully synthesized by a easily operated solid-state reaction method. According to the nominal chemical compositions, weighed  $\text{La}_2\text{O}_3$  (99.99%),  $\text{MgO}$  (99.9%),  $\text{Al}(\text{OH})_3$  (99.99%), and  $\text{MnO}_2$  (AR) by stoichiometry and grinded them thoroughly with ethyl alcohol in an agate mortar for 30 minutes. Furthermore, the well grinded and mixed raw materials were transferred to aluminum crucibles and calcined at 1500 °C for 6 h in air atmosphere. As a reference, some well grinded and mixed raw materials were calcined at 1500 °C for 6 h in 10% $\text{H}_2$ /90% $\text{N}_2$ . After firing, the samples were cooled to room temperature and the final products were obtained.

#### Characterization

The purity of the phases of all samples was analyzed by X-ray powder diffraction (XRD) using a Bruckner D8 Advance diffractometer with Cu-K $\alpha$  radiation ( $\lambda = 1.54145 \text{ \AA}$ ). The XRD data were collected in a  $2\theta$  range from 10° to 80° with the continuous scan mode at the speed of 0.80 s per step with step size of 0.01° for the refined sample. XRD Rietveld refinement of the sample was performed by Topas software. The morphology of as-synthesized phosphors was observed by scanning electron microscopy (SEM, ZEISS Merlin Compact, Germany). Energy dispersive X-ray spectrometry (EDS) was employed to measure the composition of the sample, which was attached to the SEM. The diffuse reflection spectrum was collected by a UV-3600 UV-vis-NIR spectrometer (Shimadzu, Japan) using the white powder  $\text{BaSO}_4$  as a standard material. The excitation and emission spectra as well as the luminescence decay curves were recorded at an Edinburgh FLS1000 combined with a steady-state and fluorescence lifetime spectrometer. The luminescence spectra were excited using a 450 W Xe900 xenon lamp. The quantum

yield was measured by the integrating sphere on the Edinburgh FLS 1000 fluorescence spectrometer, and white BaSO<sub>4</sub> was employed to be a reference. The luminescence decay curves were measured using a 100 W μF2 μs flash-lamp. The temperature dependent spectra and decay curves were collected using the same instrument attached with a heating equipment (TAP-02). In addition, the white LED was fabricated by mixing the LMAO:0.28Mn<sup>2+</sup>, K<sub>2</sub>SiF<sub>6</sub>:Mn<sup>4+</sup> phosphors with silica gel, and then coated on the blue InGaN LED chip. As for the blue LED chip (λ<sub>em</sub> = 450 nm), the working voltage of is 2.8-3.2 V and the working current is 5-330mA. The electroluminescence spectrum and optical property parameters of the as-fabricated pc-LED were carried out using the same instrument (FLS1000, Edinburgh).

The absorption efficiency (AE), internal quantum efficiency (IQE) and external quantum efficiency (EQE) of LMAO:0.28Mn<sup>2+</sup> phosphor were calculated by using the following equations:

$$AE = \frac{\int E_R - \int E_S}{\int E_R}$$

$$IQE = \frac{\int L_S}{\int E_R - \int E_S}$$

$$EQE = AE * IQE = \frac{\int L_S}{\int E_R}$$

in which  $E_S$  stands for the spectrum of light used for exciting the phosphor,  $L_S$  represents the emission spectrum of the phosphor, and  $E_R$  is the spectrum of excitation light without phosphor in sphere.

## Results and Discussion

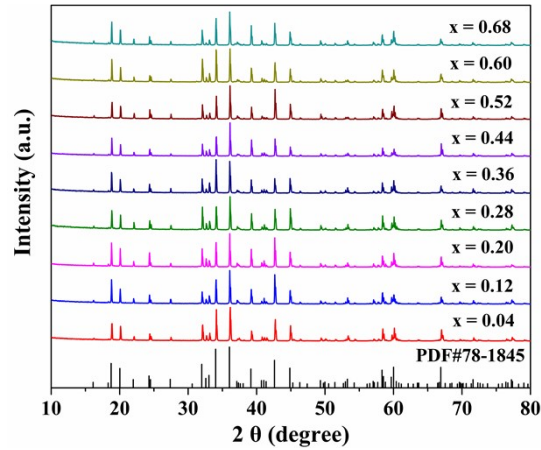

Fig. S1 XRD patterns of LMAO:xMn<sup>2+</sup> (0.04 ≤ x ≤ 0.68) phosphors.

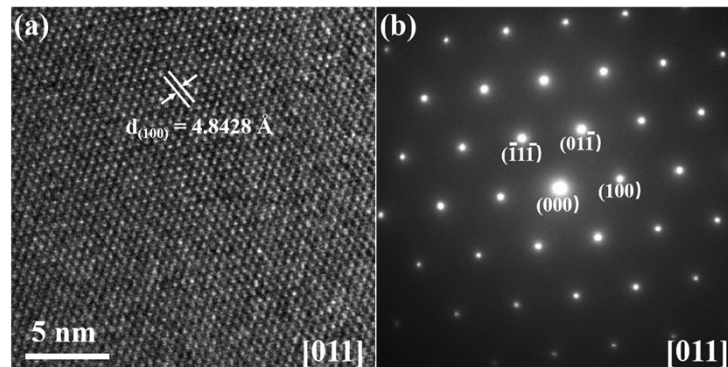

Fig. S2 (a) HRTEM image and (b) SAED pattern of LMAO:0.28Mn<sup>2+</sup>.

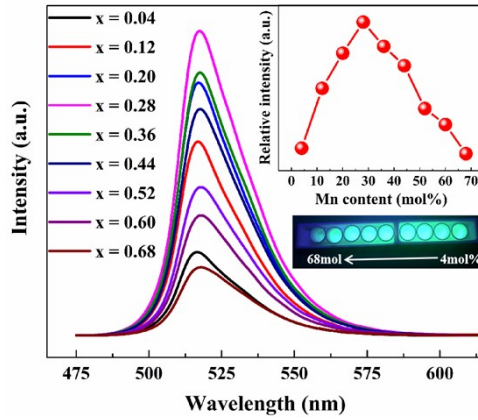

Fig. S3 The emission spectra of the LMAO:xMn<sup>2+</sup> ( $0.04 \leq x \leq 0.68$ ) samples; the inset is the digital photo and the intensity of emission peak as a function of Mn<sup>2+</sup> concentration.

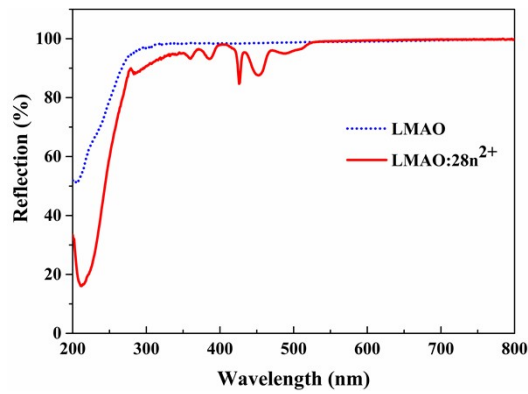

Fig. S4 The diffuse reflection spectrum of LMAO host and LMAO:0.28Mn<sup>2+</sup>.

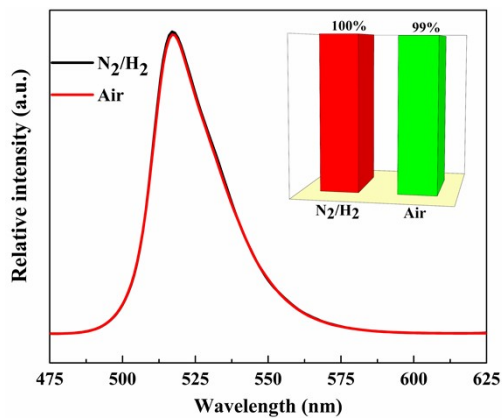

Fig. S5 The emission spectra and the relative intensity (insert picture) of LMAO:0.28Mn<sup>2+</sup> synthesized in air condition and 10%H<sub>2</sub>/90%N<sub>2</sub> atmosphere.

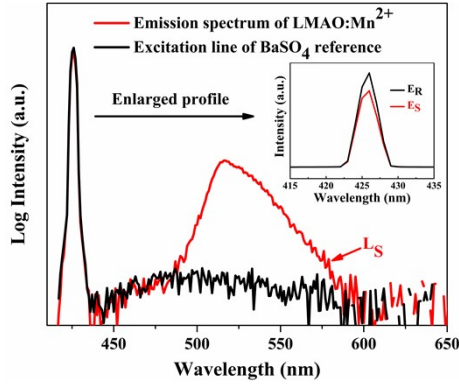

**Fig. S6** Excitation line of BaSO<sub>4</sub> and the emission spectrum of the LMAO:0.28Mn<sup>2+</sup> phosphor collected by using an integrating sphere ( $\lambda_{em} = 426$  nm), the inset shows the magnification for the excitation line of BaSO<sub>4</sub> and the emission spectrum of the LMAO:0.28Mn<sup>2+</sup>.

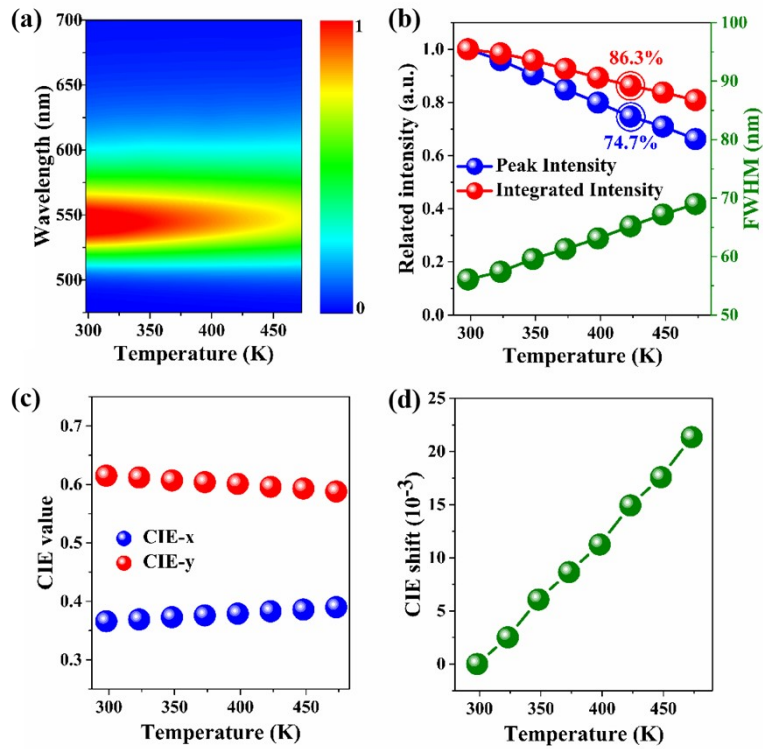

**Fig. S7** (a) The temperature-dependent emission intensities of commercial  $\beta$ -SiAlON:Eu<sup>2+</sup> recorded at temperatures from 298 to 473 K in the wavelength range of 475-700 nm. (b) Normalized integrated intensities, peak intensities, and the variation of FWHM of commercial  $\beta$ -SiAlON:Eu<sup>2+</sup> depending on increasing temperature. (c) Chromaticity coordinate values and (d) chromaticity shift of commercial  $\beta$ -SiAlON:Eu<sup>2+</sup> at different temperatures.

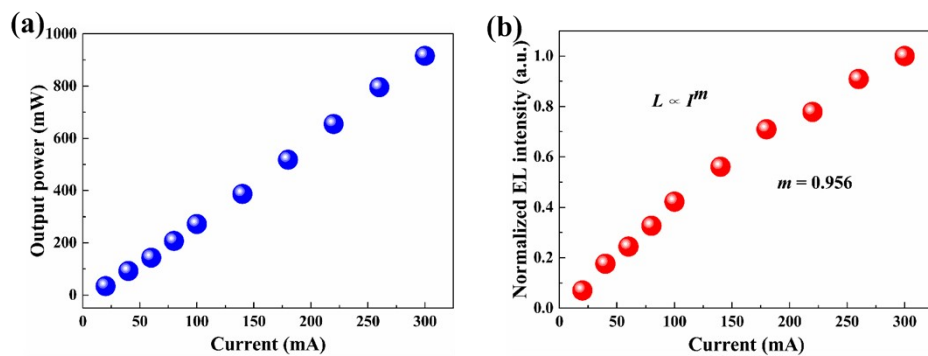

**Fig. S8** (a) Output power-current curve and (b) normalized electrofluorescence intensity-current curve of blue LED in the current range 20-300 mA.

**Table S1.** Crystallographic Data of  $\text{LaMg}_{0.72}\text{Mn}_{0.28}\text{Al}_{11}\text{O}_{19}$  Derived from Rietveld Refinement of X-ray Diffraction Powder Diffraction Data.

| Formula                | $\text{LaMg}_{0.72}\text{Mn}_{0.28}\text{Al}_{11}\text{O}_{19}$ |
|------------------------|-----------------------------------------------------------------|
| crystal system         | Hexagonal                                                       |
| space group            | $P6_3/mmc$ (No.194)                                             |
| a (Å)                  | 5.5915(7)                                                       |
| c (Å)                  | 21.9742(6)                                                      |
| V (Å <sup>3</sup> )    | 594.9778(1)                                                     |
| formula units per cell | Z = 2                                                           |
| temperature (K)        | 297                                                             |
| 2θ range (°)           | 10-80                                                           |
| step size (°)          | 0.01                                                            |
| structure refinement   | Topas 5                                                         |
| profile function       | PVII                                                            |
| R <sub>exp</sub>       | 3.22                                                            |
| R <sub>wp</sub>        | 5.16                                                            |
| R <sub>p</sub>         | 3.86                                                            |
| GOF                    | 1.60                                                            |

**Table S2.** The comparisons of green phosphors and the color gamut of their phosphor-converted white LED devices using  $K_2SiF_6:Mn^{4+}$  as red light in CIE 1931 system.

| Phosphor                                           | Peak (nm) | FWHM (nm) | NTSC (%) | Ref.      |
|----------------------------------------------------|-----------|-----------|----------|-----------|
| $SrAl_2Si_2O_8:Mn^{2+}$                            | 517       | 26        | 120      | [1]       |
| $BaZnAl_{10}O_{17}:Mn^{2+}$                        | 516       | 31        | 110      | [2]       |
| $MgAl_2O_4:Mn^{2+}$                                | 525       | 35        | 116      | [3]       |
| $Sr_2Li(Al, Ga)O_4:Eu^{2+}$                        | 512       | 40        | 107      | [4]       |
| $RbLi_7Si_2O_8:Eu^{2+}$                            | 532       | 38        | 112      | [5]       |
| $Rb_3Na(Li_3SiO_4)_4:Eu^{2+}$                      | 527       | 42        | 103.5    | [6]       |
| $Sr_2MgAl_{22}O_{36}:Mn^{2+}$                      | 518       | 26        | 127      | [7]       |
| $RbNa(Li_3SiO_4)_2:Eu^{2+}$                        | 523       | 41        | 113      | [8]       |
| $RbLi(Li_3SiO_4)_2:Eu^{2+}$                        | 530       | 42        | 107      | [9]       |
| $\beta$ -SiAlON:Eu <sup>2+</sup>                   | 540       | 54        | 96       | [10]      |
| $Ba_2LiSi_7AlN_{12}:Eu^{2+}$                       | 515       | 61        | -        | [11]      |
| $Ba[Li_2(Al_2Si_2)N_6]:Eu^{2+}$                    | 532       | 57        | -        | [12]      |
| $SrGa_2S_4:Eu^{2+}$                                | 540       | 47        | 86.4     | [13]      |
| $CsPbBr_3$                                         | 523       | 23        | 102      | [14]      |
| $\gamma$ -AlON:Mn <sup>2+</sup> , Mg <sup>2+</sup> | 520       | 44        | 102.4    | [15]      |
| $LaMgAl_{11}O_{19}:Mn^{2+}$                        | 517       | 24        | 131      | This work |

## References

- [1] B. Wang, Y. C. Kong, Z. K. Chen, X. S. Li, S. P. Wang, Q. G. Zeng, *Opt. Mater.* **2020**, *99*, 109535.
- [2] H. R. Li, Y. J. Liang, S. Q. Liu, W. L. Zhang, Y. Y. Bi, Y. M. Gong, W. Lei, *Adv. Optical Mater.* **2021**, *9*, 2100799.
- [3] E. H. Song, Y. Y. Zhou, Y. Wei, X. X. Han, Z. R. Tao, R. L. Qiu, Z. G. Xia, Q. Y. Zhang, *J. Mater. Chem. C* **2019**, *7*, 8192-8198.
- [4] J. W. Qiao, Y. Y. Zhou, M. S. Molokeev, Q. Y. Zhang, Z. G. Xia, *Laser Photonics Rev.* **2021**, *15*, 2100392.
- [5] M. Zhao, H. X. Liao, L. X. Ning, Q. Y. Zhang, Q. L. Liu, Z. G. Xia, *Adv. Mater.* **2018**, *30*, 1802489.
- [6] M. Liao, Q. Wang, Q. M. Lin, M. X. Xiong, X. Zhang, H. F. Dong, Z. P. Lin, M. R. Wen, D. Y. Zhu, Z. F. Mu, F. G. Wu, *Adv. Optical Mater.* **2021**, *9*, 2100465.
- [7] Y. L. Zhu, Y. J. Liang, S. Q. Liu, H. R. Li, J. H. Chen, *Adv. Optical Mater.* **2019**, *7*, 1801419.
- [8] H. X. Liao, M. Zhao, Y. Y. Zhou, M. S. Molokeev, Q. L. Liu, Q. Y. Zhang, Z. G. Xia, *Adv. Funct. Mater.* **2019**, *29*, 1901988.
- [9] M. Zhao, H. Liao, L. Ning, Q. Zhang, Q. Liu, Z. Xia, *Adv. Mater.* **2018**, *30*, 1802489.
- [10] S. X. Li, L. Wang, D. Tang, Y. J. Cho, X. J. Liu, X. T. Zhou, L. Lu, L. Zhang, T. Takeda, N. Hirosaki, R. J. Xie, *Chem. Mater.* **2018**, *30*, 494.
- [11] T. Takeda, N. Hirosaki, S. Funahshi, R. J. Xie, *Chem. Mater.* **2015**, *27*, 5892-5898.
- [12] P. Strobel, S. Schmiechen, M. Siegert, A. Tücks, P. J. Schmidt, W. Schnick, *Chem. Mater.* **2015**, *27*, 6109-6115.
- [13] J. H. Oh, H. Kang, M. Ko, Y. R. Do, *Opt. Express* **2015**, *23*, A791.
- [14] X. J. Zhang, H. C. Wang, A. C. Tang, S. Y. Lin, H. C. Tong, C. Y. Chen, Y. C. Lee, T. L. Tsai, R. S. Liu, *Chem. Mater.* **2016**, *28*, 8493.
- [15] R. J. Xie, N. Hirosaki, X. J. Liu, T. Takeda, H. L. Li, *Appl. Phys. Lett.* **2008**, *92*, 201905.
